# Supplementary figures and images for: Vitamin B6 is essential for serine de novo biosynthesis
Source: Springer Nature journal article supplement (doi:10.1007/s10545-017-0061-3), 2017-08-11

**Figure S1**

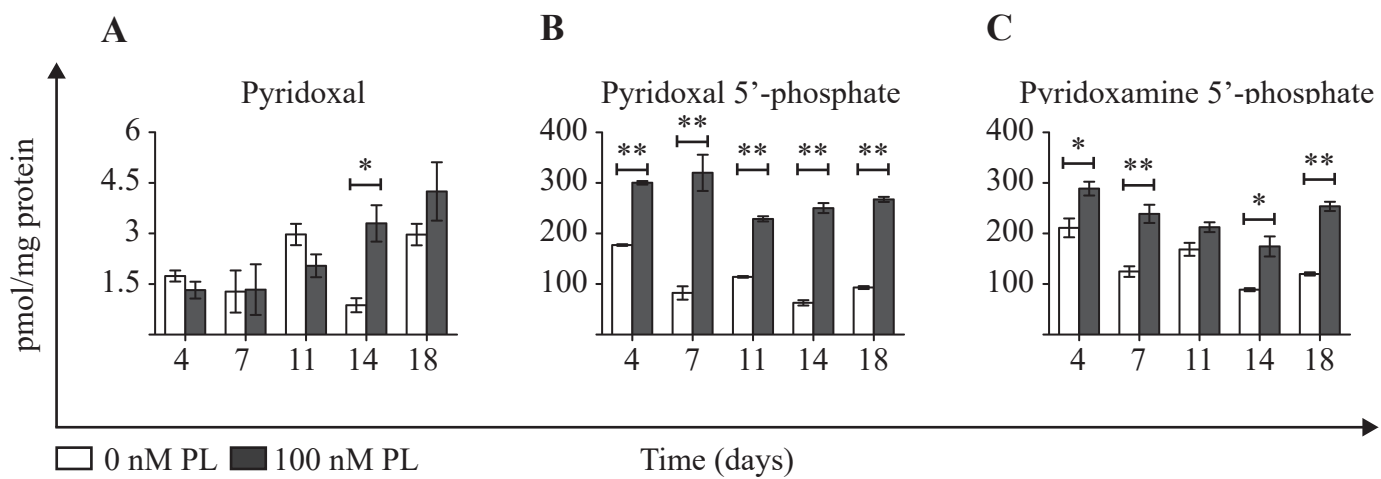

Supplement: MOESM1 [file 14209084]
